# Supplementary material for: Disclosing Bias in Bisulfite Assay: MethPrimers Underestimate High DNA Methylation
Source: PubMed Central journal article supplement (PMC4333220; doi:10.1371/journal.pone.0118318), 2015-02-18

| Supplementary Figure 5 graphic legend |                                                                                     |                                                                    |
|---------------------------------------|-------------------------------------------------------------------------------------|--------------------------------------------------------------------|
|                                       |                                                                                     |                                                                    |
|                                       | 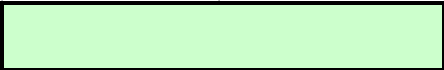   | Light green: High methylated conditions / analyzed by MIPs         |
|                                       |                                                                                     |                                                                    |
|                                       |    | Dark green: Low methylated conditions / analyzed by MIPs           |
|                                       |                                                                                     |                                                                    |
|                                       |    | Light yellow: High methylated conditions / analyzed by MethPrimers |
|                                       |                                                                                     |                                                                    |
|                                       |    | Dark yellow: Low methylated conditions / analyzed by MethPrimers   |
|                                       |                                                                                     |                                                                    |
|                                       |    | Black box: methylated cytosine                                     |
|                                       |  | White box: unmethylated cytosine                                   |
|                                       |  | Grey box: undetermined                                             |
|                                       |                                                                                     |                                                                    |
|                                       | <b>"Clone":</b>                                                                     | Positive bacterial colonies sequenced per sample                   |
|                                       | <b>"% methylation":</b>                                                             | % methylation for each cytosine in each sample                     |
|                                       | <b>"Cytosine":</b>                                                                  | position (bp) of cytosines in the promoter sequence (CpGs in red)  |



# Supplementary Figure 5b

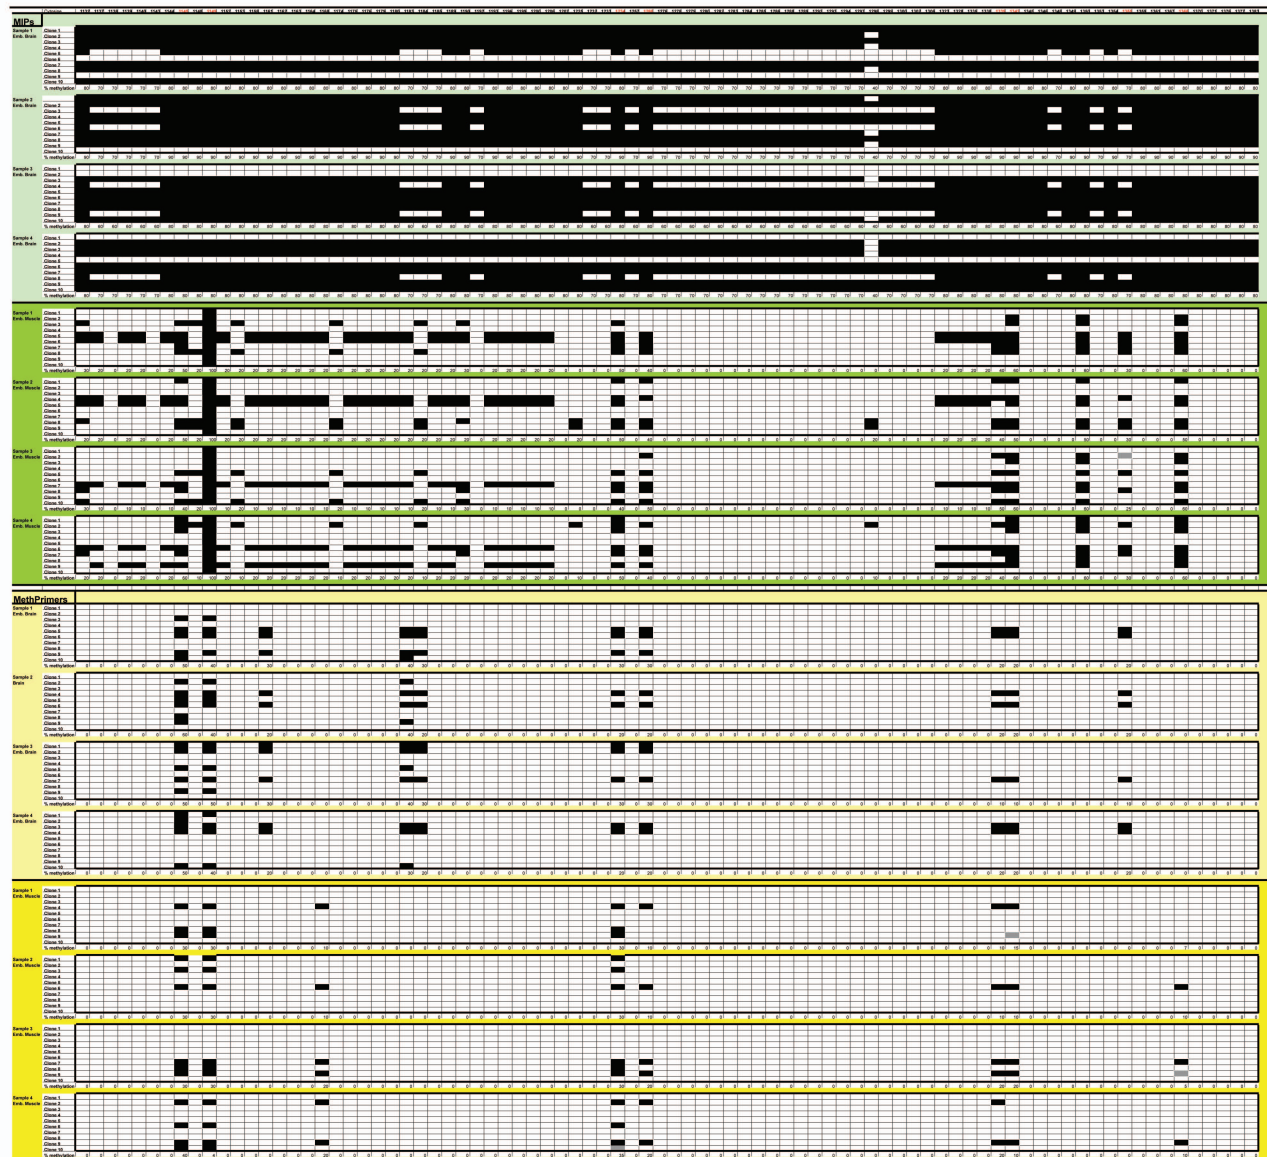

# Supplementary Figure 5c

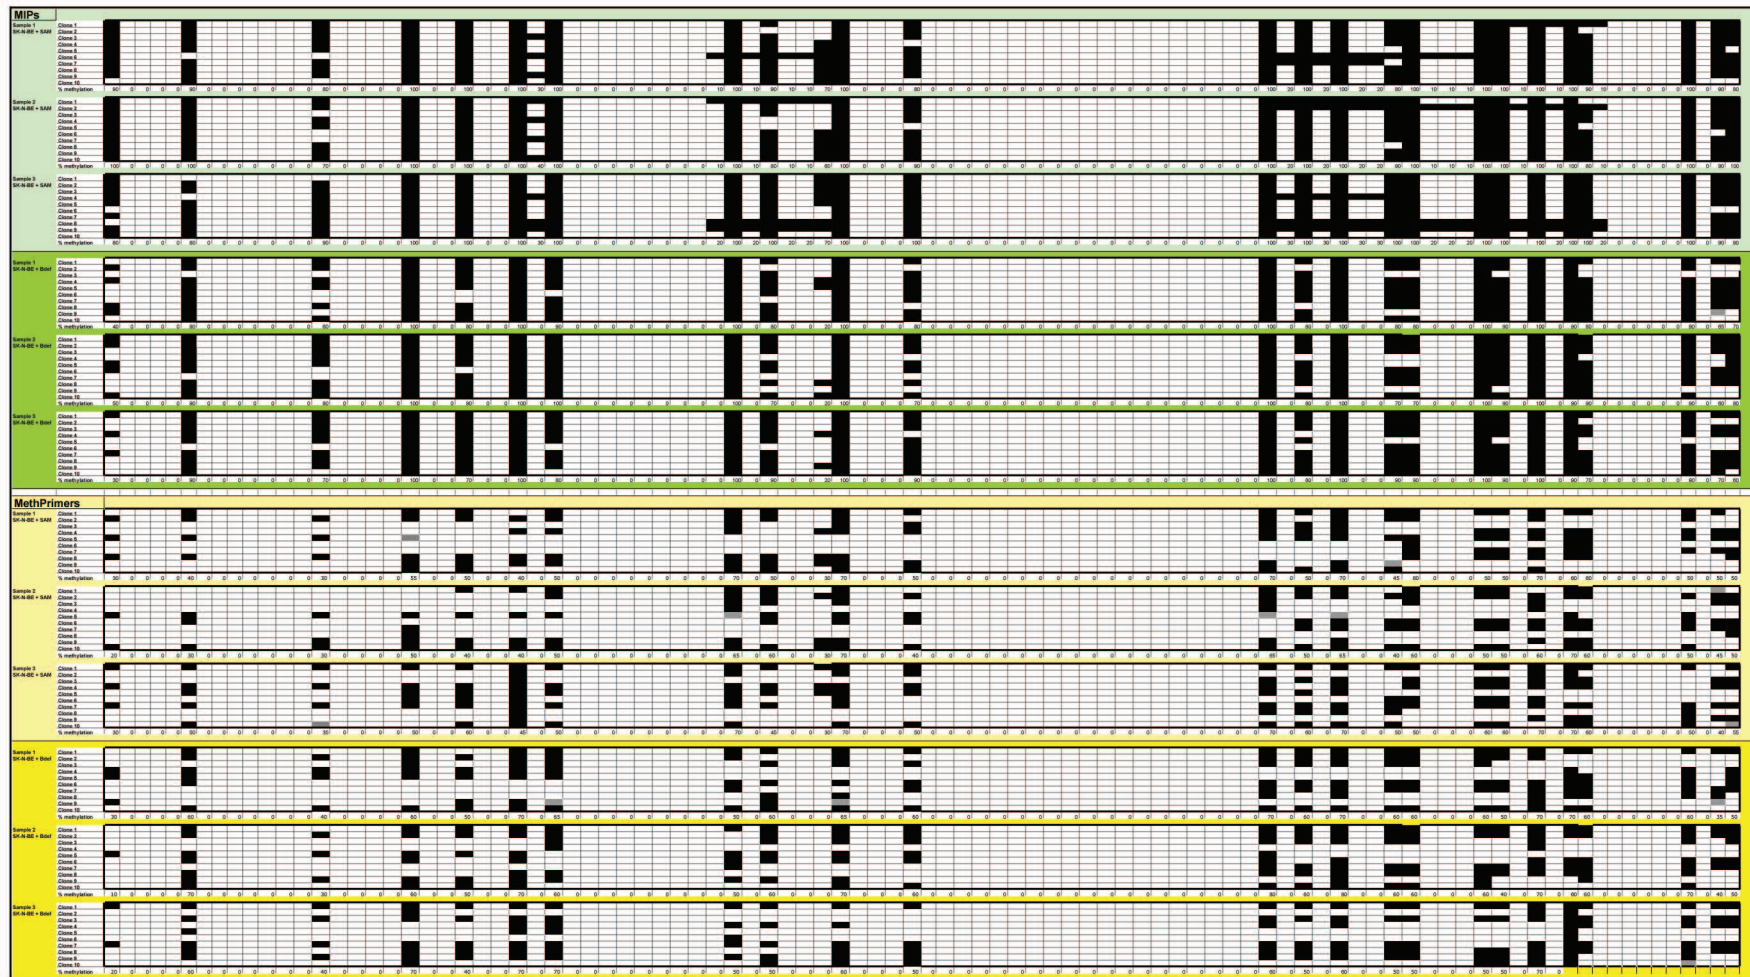

# Supplementary Figure 5d

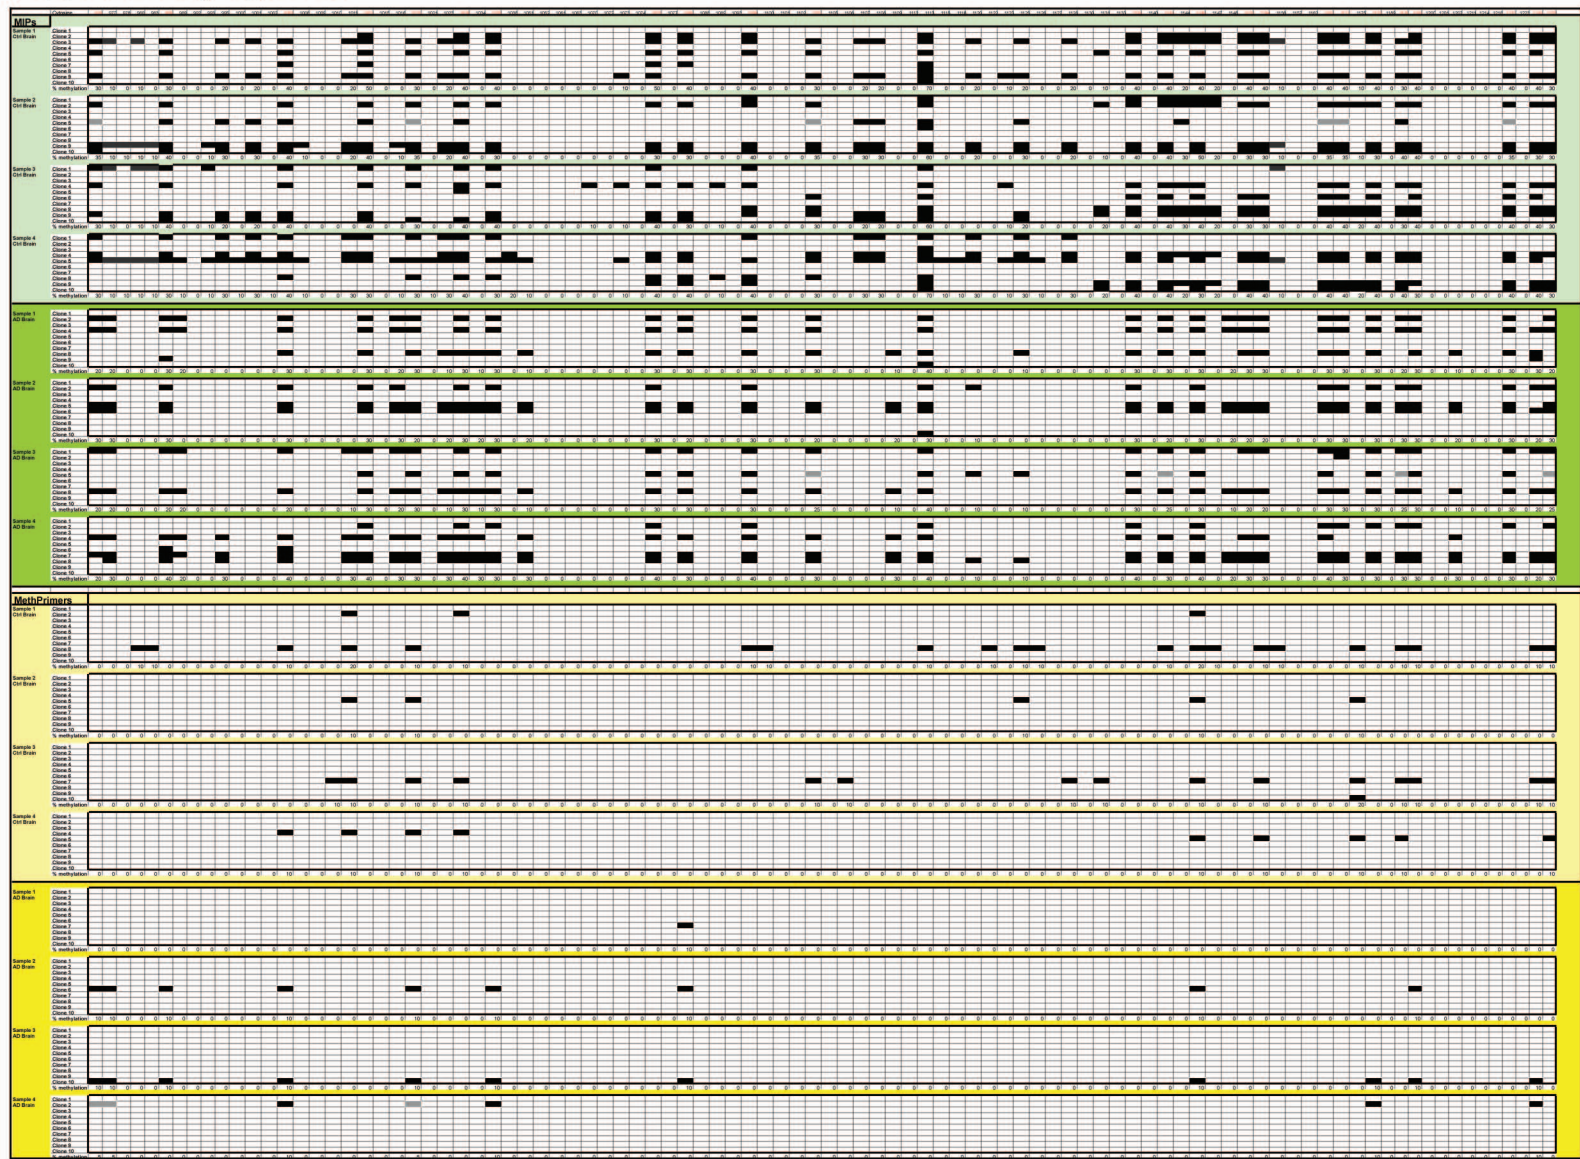

Supplement: pone.0118318.s005.pdf [file pone.0118318.s005.pdf]
