# Supplementary material for: Disclosing Bias in Bisulfite Assay: MethPrimers Underestimate High DNA Methylation
Source: PubMed Central journal article supplement (PMC4333220; doi:10.1371/journal.pone.0118318), 2015-02-18
Supplement: pone.0118318.s001.pdf [file pone.0118318.s001.pdf]

**a**

Myogenin 5'-flanking (mouse); GeneBank: M95800

|      |                    |                   |                   |                   |                   |                   |
|------|--------------------|-------------------|-------------------|-------------------|-------------------|-------------------|
| 1021 | CTGGAGTGGT         | CCTGATGTGG        | TAGTGGTAGG        | TCTTTAGGGG        | TTCATGGGA         | CTGACATAGT        |
| 1081 | AC <b>GGTTTAAG</b> | <b>GTGCTGCTGC</b> | <b>TGAGCAGGAA</b> | <b>AGAGAAGGCT</b> | <b>AAGTGGATT</b>  | TCAAGACCCC        |
| 1141 | TTCCCGTCCG         | TCCAAGACAA        | CCCCTTTCTT        | GTTCCCTTCC        | TGCCCTGTCC        | ACCAGCTGCC        |
| 1201 | TTGGACCATG         | GAGGAGAGAG        | TAGGCAGGAG        | GCCCCGGTAG        | GAGTAATTGA        | AAGGAGCAGA        |
| 1261 | TGAGACGGGG         | GAATGCACCC        | ACCCCCACCT        | TCCCTGCCCC        | ACAGGNTGTG        | GAGAAATGAA        |
| 1321 | AACTAATCAA         | ATTACAGCCG        | ACGGCCTCCC        | GACCCGTGCA        | CAGGAGCCGC        | CTGGGCCAGG        |
| 1381 | GGC <b>AGGCCTG</b> | <b>CAGGGTGGGG</b> | <b>TGGGGGCAAA</b> | <b>AGGAGAGGGA</b> | <b>AGGGGAATCA</b> | <b>CATGTAATCC</b> |
| 1541 | ACTGGAAACG         | TCTTGATGTG        | CAGCAACAGC        | TTAGAGGGGG        | GCTCAGGTTT        | CTGTGGCGTT        |

PSEN1 5'-flanking (human); GeneBank: AF458103

|      |                    |                   |                   |                   |                   |                   |
|------|--------------------|-------------------|-------------------|-------------------|-------------------|-------------------|
| 1021 | CTGGAGTGGT         | CCTGATGTGG        | TAGTGGTAGG        | TCTTTAGGGG        | TTCATGGGA         | CTGACATAGT        |
| 1081 | AC <b>GGTTTAAG</b> | <b>GTGCTGCTGC</b> | <b>TGAGCAGGAA</b> | <b>AGAGAAGGCT</b> | <b>AAGTGGATT</b>  | TCAAGACCCC        |
| 1141 | TTCCCGTCCG         | TCCAAGACAA        | CCCCTTTCTT        | GTTCCCTTCC        | TGCCCTGTCC        | ACCAGCTGCC        |
| 1201 | TTGGACCATG         | GAGGAGAGAG        | TAGGCAGGAG        | GCCCCGGTAG        | GAGTAATTGA        | AAGGAGCAGA        |
| 1261 | TGAGACGGGG         | GAATGCACCC        | ACCCCCACCT        | TCCCTGCCCC        | ACAGGNTGTG        | GAGAAATGAA        |
| 1321 | AACTAATCAA         | ATTACAGCCG        | ACGGCCTCCC        | GACCCGTGCA        | CAGGAGCCGC        | CTGGGCCAGG        |
| 1381 | GGC <b>AGGCCTG</b> | <b>CAGGGTGGGG</b> | <b>TGGGGGCAAA</b> | <b>AGGAGAGGGA</b> | <b>AGGGGAATCA</b> | <b>CATGTAATCC</b> |
| 1541 | ACTGGAAACG         | TCTTGATGTG        | CAGCAACAGC        | TTAGAGGGGG        | GCTCAGGTTT        | CTGTGGCGTT        |

Legend: **MIPs**; **MethPrimers**

**b**

| Mouse myogenin 5'-flanking |                                                                           |                                                                                                                                                        |
|----------------------------|---------------------------------------------------------------------------|--------------------------------------------------------------------------------------------------------------------------------------------------------|
|                            | Forward                                                                   | Reverse                                                                                                                                                |
| MethylC-insensitive        | 5'-AGGAAAGAGAAGG <sup>C</sup> <sub>T</sub> TAAGTGG-3'<br>(nt 1106 – 1126) | 5'-ACCCACCCCT <sup>G</sup> <sub>A</sub> CA <sup>G</sup> <sub>A</sub> <sup>G</sup> <sub>A</sub> CC-3'<br>(nt 1401 – 1385)                               |
| Methprimers                | 5'-GGTTTAAGGTGTTGTTGTTGAGTAG-3'<br>(nt 1083 – 1107)                       | 5'-AAATTACATATAATTCCCCTTCCCT-3'<br>(nt 1440 – 1416)                                                                                                    |
| Human PSEN1 5'-flanking    |                                                                           |                                                                                                                                                        |
|                            | Forward                                                                   | Reverse                                                                                                                                                |
| MethylC-insensitive        | 5'-T <sup>C</sup> <sub>T</sub> ATTGAGTGGTGGGAGAGGG-3'<br>(nt 797 – 818)   | 5'-TTTT <sup>G</sup> <sub>A</sub> TTCC <sup>G</sup> <sub>A</sub> AT <sup>G</sup> <sub>A</sub> T <sup>G</sup> <sub>A</sub> AAACC-3'<br>(nt 1247 – 1227) |
| Methprimers                | 5'-TGGGTTTAATTTATATAGGGTTTT-3'<br>(nt 949 – 973)                          | 5'-TAACTCAAATTCCTTCCAAACCA-3'<br>(nt 1277 – 1255)                                                                                                      |
