# Supplementary material for: Disclosing Bias in Bisulfite Assay: MethPrimers Underestimate High DNA Methylation
Source: PubMed Central journal article supplement (PMC4333220; doi:10.1371/journal.pone.0118318), 2015-02-18
Supplement: pone.0118318.s002.pdf [file pone.0118318.s002.pdf]

**a**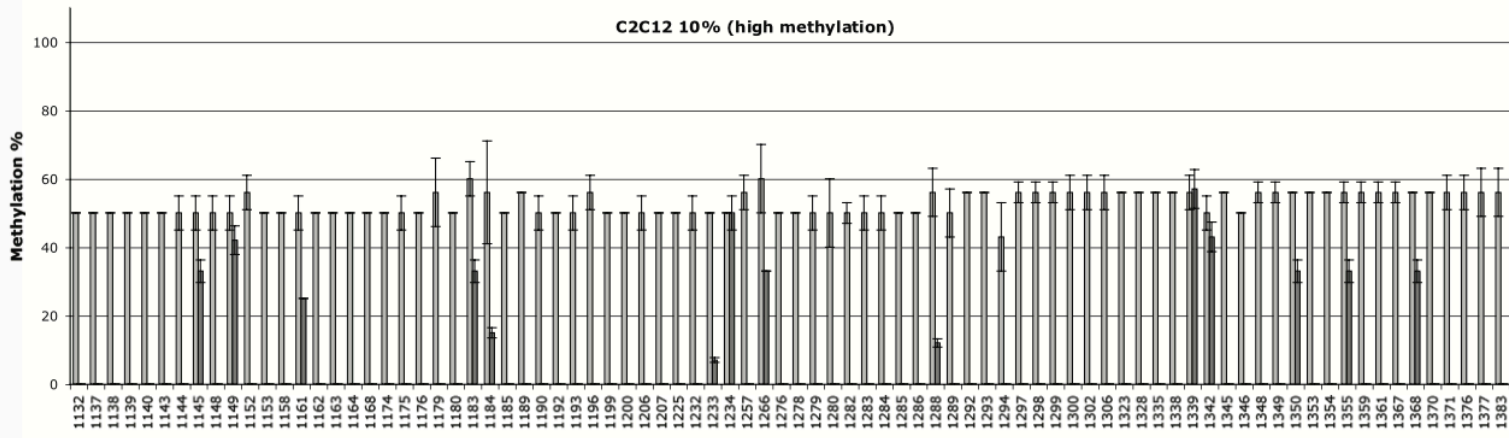**b**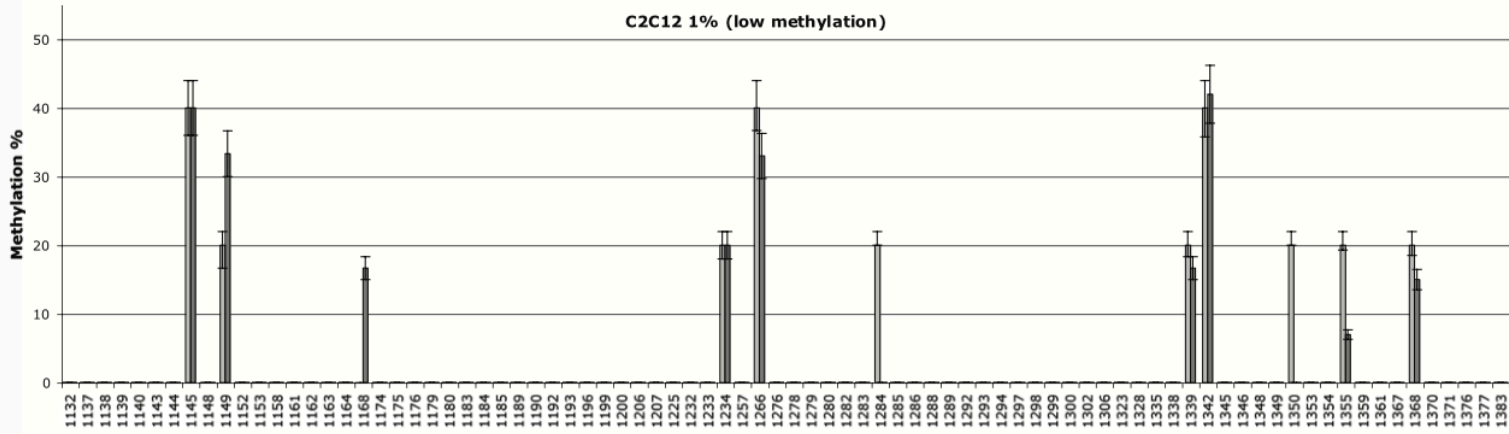**c**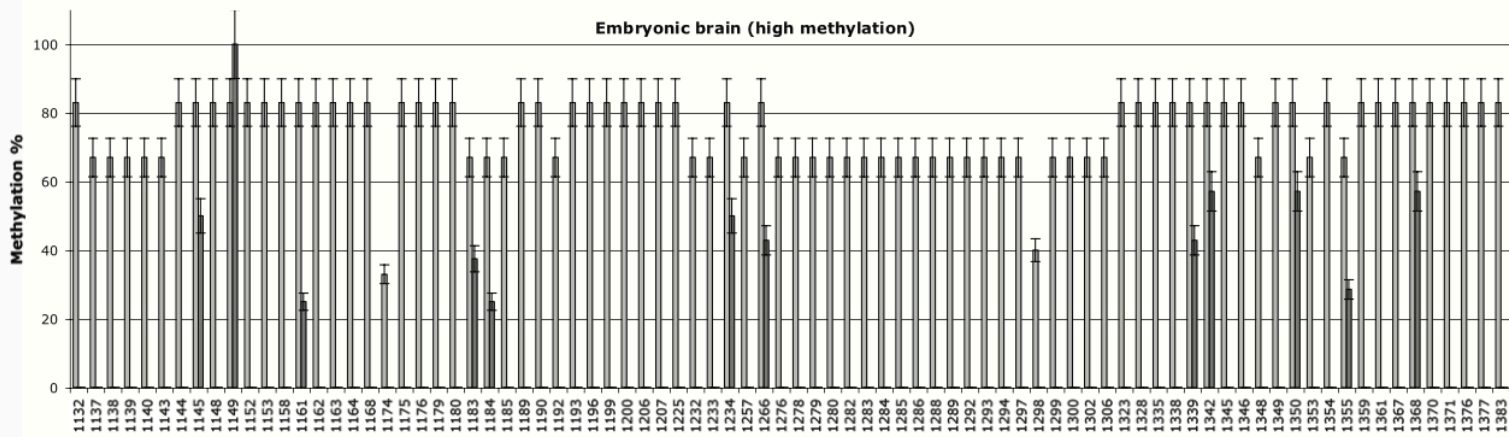**d**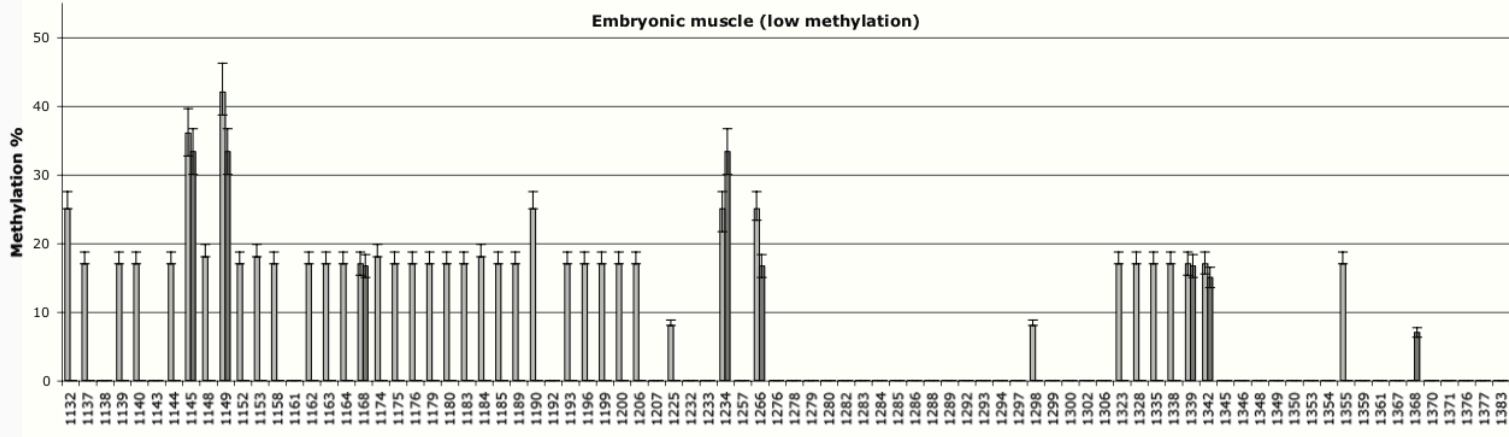

MIPs

MethPrimers
