# Supplementary material for: Disclosing Bias in Bisulfite Assay: MethPrimers Underestimate High DNA Methylation
Source: PubMed Central journal article supplement (PMC4333220; doi:10.1371/journal.pone.0118318), 2015-02-18
Supplement: pone.0118318.s003.pdf [file pone.0118318.s003.pdf]

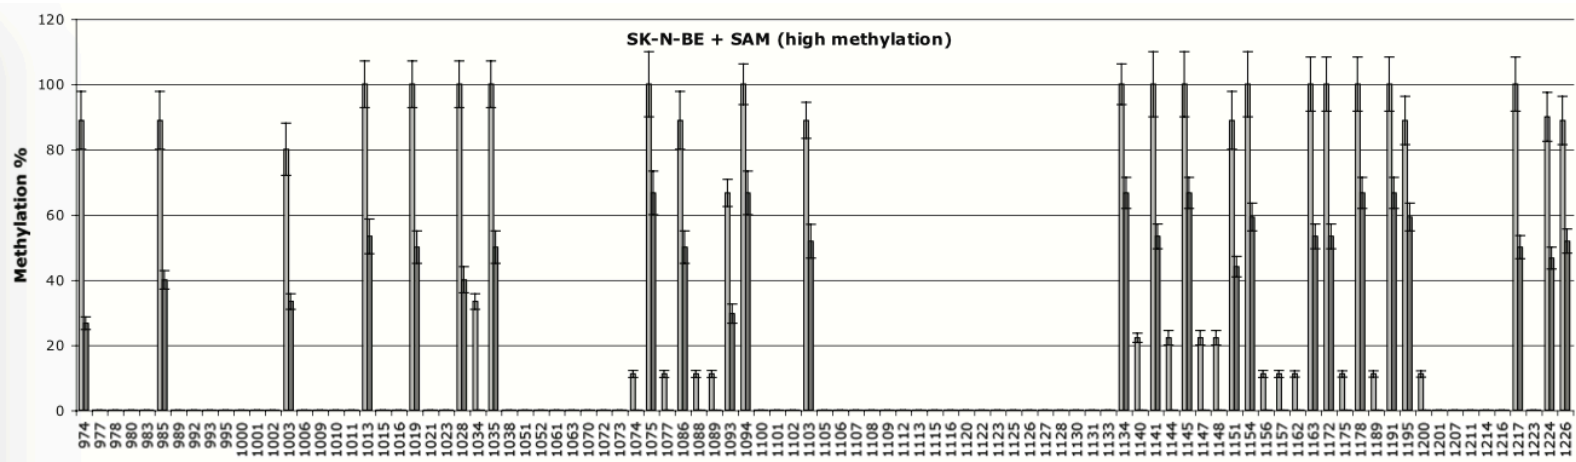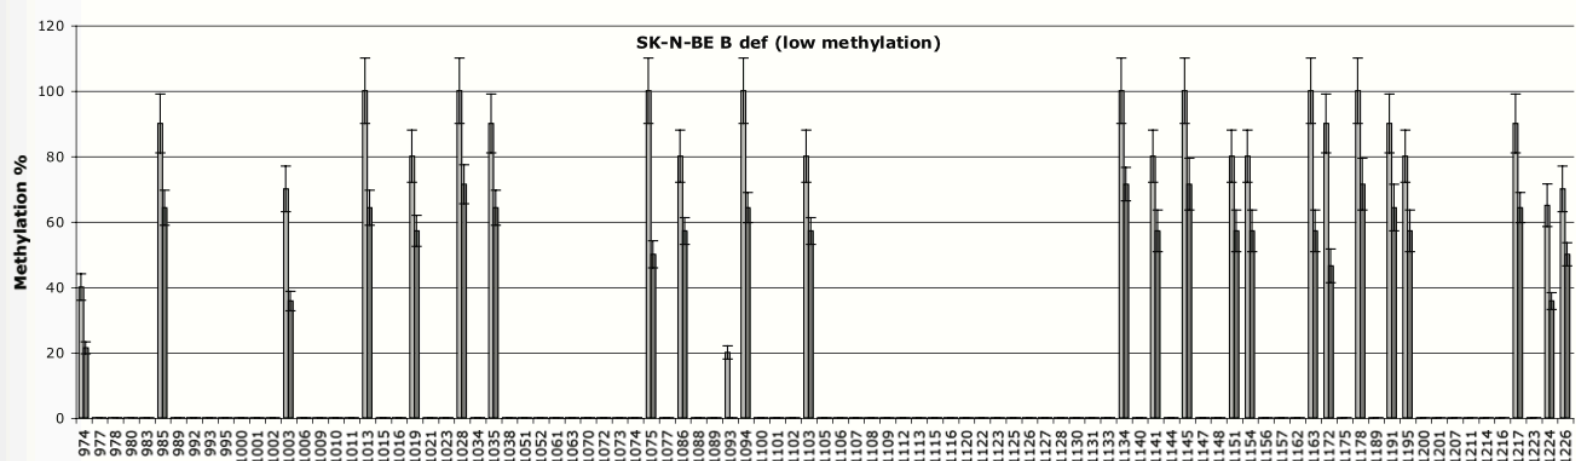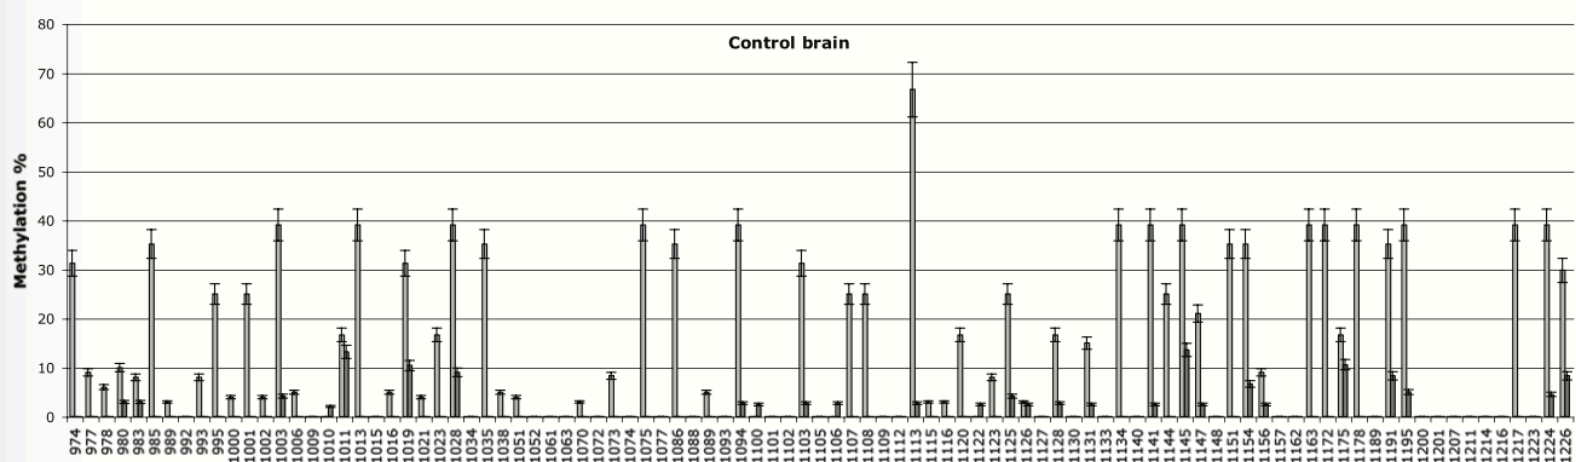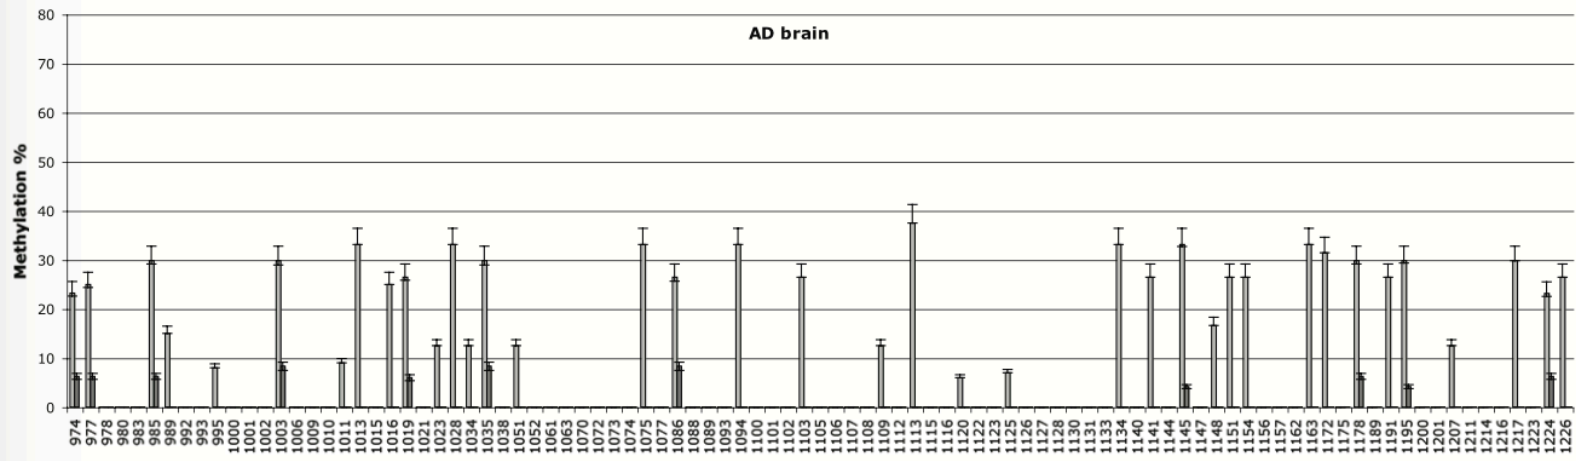

■ MIPs      ■ MethPrimers
