# Supplementary material for: Disclosing Bias in Bisulfite Assay: MethPrimers Underestimate High DNA Methylation
Source: PubMed Central journal article supplement (PMC4333220; doi:10.1371/journal.pone.0118318), 2015-02-18
Supplement: pone.0118318.s004.pdf [file pone.0118318.s004.pdf]

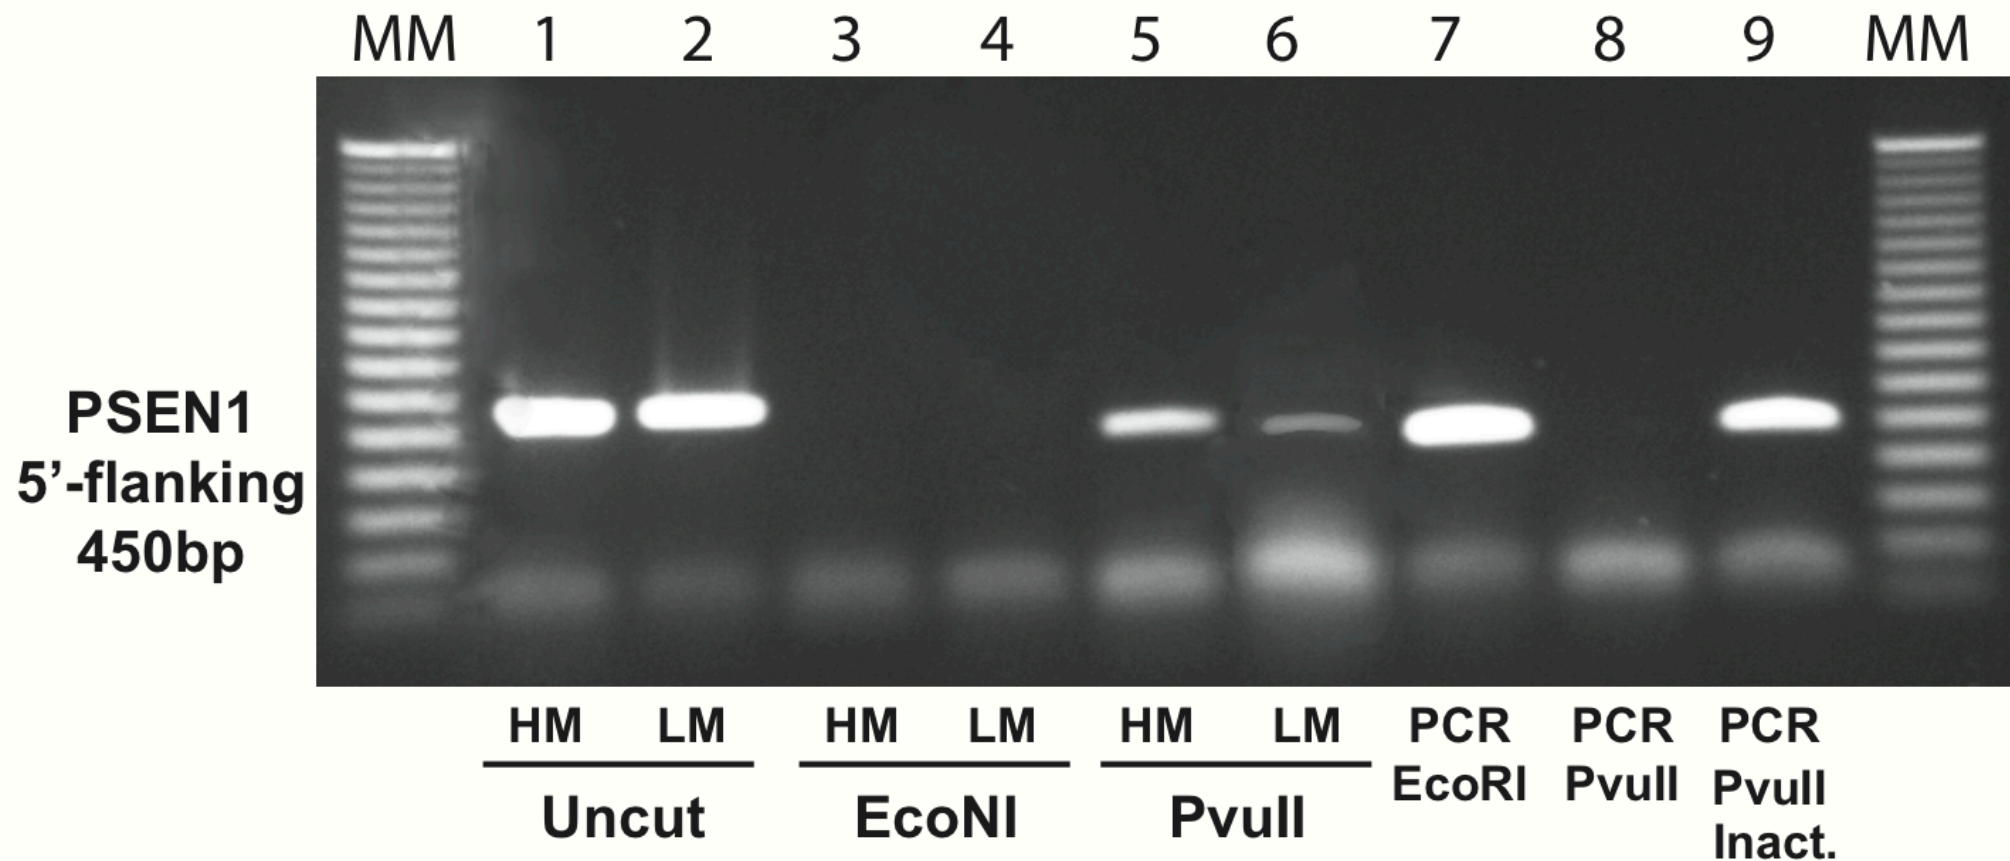

|       | Recognition sequence | Cutting(s) in HS PSEN1 5'-flanking | Notes                          |
|-------|----------------------|------------------------------------|--------------------------------|
| PvuII | CAG/C*TG             | 862                                | inhibited by methylation in C* |
| EcoNI | CCTNN/NNNAGG         | 1204                               | no inhibition by methylation   |
| EcoRI | G/AATTC              | none                               |                                |
